# Supplementary material
Source: PubMed Central journal article supplement (PMC4936271)
Supplement: NIHMS788080-supplement-supplement_1.pdf [file NIHMS788080-supplement-supplement_1.pdf]

## Supplementary Materials

*Implicit Association Test (IAT) Methods*

After scanning, participants completed a computerized measure to assess implicit Black-danger associations known as the IAT (Dasgupta & Greenwald, 2001; Greenwald, McGhee, & Schwartz, 1998). The task involved making speeded judgments about Black and White faces, as well as words associated with safety and danger. In an initial block of 25 trials, participants were shown faces one at a time on the computer screen and were required to categorize the individuals as Black or White by pressing either a red or green key on a button box. Response mapping for the categories of faces was counterbalanced across participants. In the next block of 25 trials, they were shown a series of words and categorized them as representing things relating to safety (“nice,” “kind,” “friend,” “trust,” “peaceful,” “happiness,” “protected,” “secure,” “harmony,” “unity,” “caring,” “pleasant”) or danger (e.g., “violence,” “aggression,” “mean,” “brutal,” “nasty,” “attacking,” “knife,” “enemy,” “fight,” “hurtful,” “cruel,” “fear”) by pressing the same red or green keys on the button box. Response mapping for the word categories was also counterbalanced across participants. Participants then completed two blocks of trials involving both Black/White faces and safety/danger words, making Black/White judgments whenever they saw a picture and safety/danger judgments whenever they saw a word. In the stereotype-congruent combined block, the same key was used to indicate responses to the categories of White and safety whereas another was used to indicate responses to the categories of Black and danger. In the stereotype-incongruent combined block, the same key on the keyboard was used to indicate responses to the categories of Black and safety, whereas another key was used to indicate the White and danger

responses. Participants completed 100 stereotype-congruent trials and 100 stereotype-incongruent trials (each preceded by 50 practice trials), with equivalent numbers of racial/safety trials within each, and the order of stereotype-consistent versus –inconsistent blocks was counterbalanced across participants. Additionally, in between the stereotype-consistent and –inconsistent blocks, each participant completed another word classification block composed of 25 trials, only this time with the response mappings for the safety and danger words reversed from the previous word block’s mapping (e.g., if in the first word block safety words were paired with the green key and danger words with the red key, in the reverse word block, safety words were paired with the red key and danger words with the green key). The difference in response time to the stereotype-congruent and -incongruent blocks provides an IAT bias score, or an indication of the degree to which participants implicitly associate danger with Blacks versus Whites. The difference score was computed as a D score according to Greenwald, Nosek, and Banaji (2003).

Supplementary Table 1. Areas Showing Significant Blood-Oxygen-Level-Dependent Effects

| <b>Region</b>                         | <b>BA</b> | <b>Max Z</b> | <b>Voxels</b> | <b>x</b> | <b>y</b> | <b>z</b> |
|---------------------------------------|-----------|--------------|---------------|----------|----------|----------|
| <i>Unarmed&gt;Armed</i>               |           |              |               |          |          |          |
| Lingual Gyrus (R)                     | BA18      | -3.68        | 1022          | 18       | -74      | -8       |
| Lingual Gyrus                         | BA19      | -3.75        | 377           | -18      | -66      | -4       |
| Postcentral Gyrus (R)                 | BA43      | -3.01        | 243           | 60       | -12      | 22       |
| Middle Temporal Gyrus (R)             | BA39      | -3.45        | 212           | 48       | -56      | 6        |
| Operculum (R)                         | BA13      | -3.10        | 203           | 38       | 12       | 12       |
| Cingulate Gyrus (R)                   | BA32      | -3.02        | 135           | 10       | 14       | 42       |
| <i>Armed &gt;Unarmed</i>              |           |              |               |          |          |          |
| Superior Frontal Gyrus                | BA10      | 3.35         | 756           | -10      | 66       | 16       |
| Superior Frontal Gyrus (R)            | BA10      | 3.35         | 223           | 22       | 64       | 6        |
| Inferior Parietal Lobule              | BA39      | 3.36         | 196           | -48      | -66      | 42       |
| <i>White Unarmed&gt;Black Unarmed</i> |           |              |               |          |          |          |
| Cingulate Gyrus (R)                   | BA32      | -3.02        | 197           | 10       | 14       | 42       |
| Superior Temporal Gyrus               | BA42      | -2.97        | 131           | -62      | -26      | 10       |
| <i>Black Armed&gt;White Armed</i>     |           |              |               |          |          |          |
| Middle Occipital Gyrus (R)            | BA19      | 3.66         | 2432          | 38       | -78      | 8        |
| Lingual Gyrus                         | BA18      | 3.27         | 716           | -12      | -84      | -8       |
| Lingual Gyrus                         | BA19      | 3.14         | 401           | -30      | -62      | -6       |
| Cuneus                                | BA19      | 3.42         | 342           | -18      | -94      | 28       |
| Posterior Cingulate (R)               | BA30      | 3.30         | 283           | 14       | -58      | 12       |

Note. Voxelwise and clusterwise differences at  $p < .005$  and  $p < .05$ , respectively. A blank line indicates that no region passed cluster threshold for that contrast. BA = Broadmann Area.
